# Supplementary material
Source: PubMed Central journal article supplement (PMC5728325)

Supplemental Figure 1.

Prior PB

t-MN

UID12766

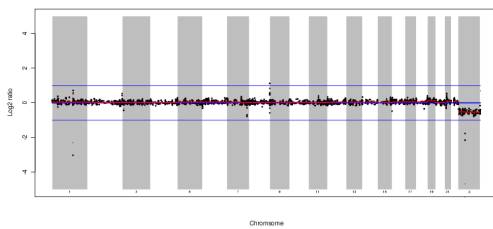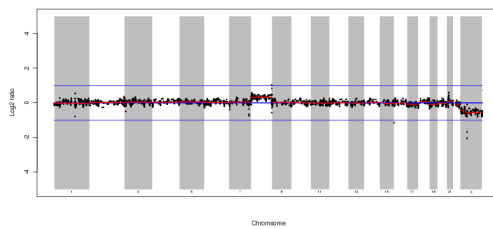

UID10164

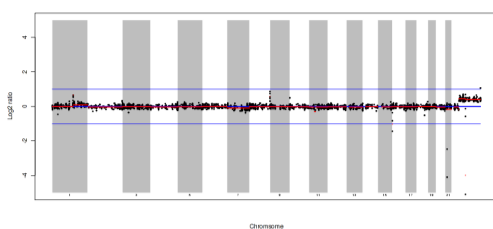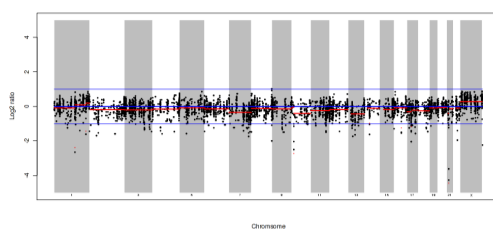

UID6982

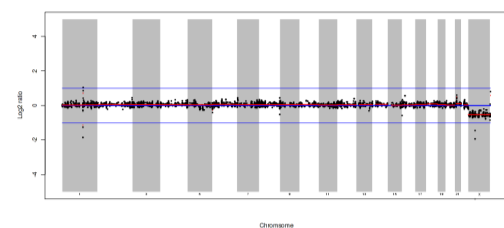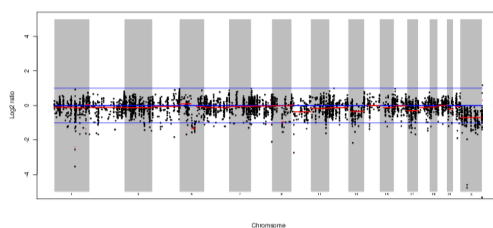

UID488

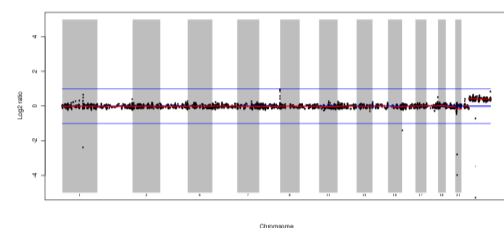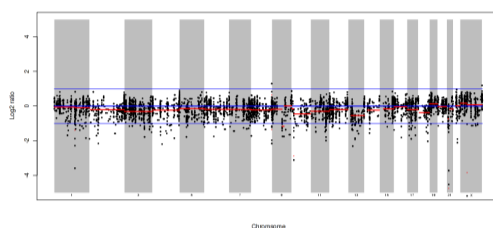

UID4473

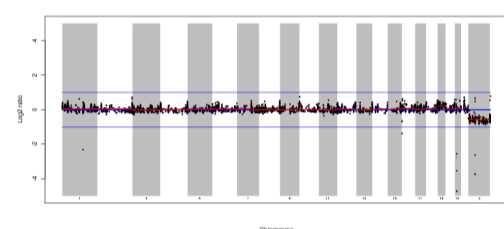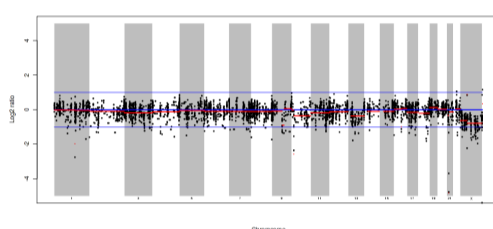

UID17285

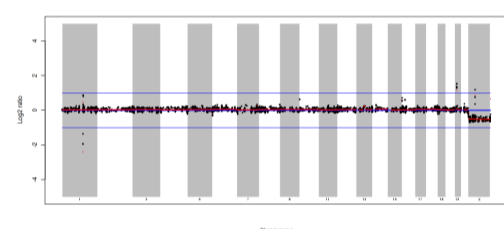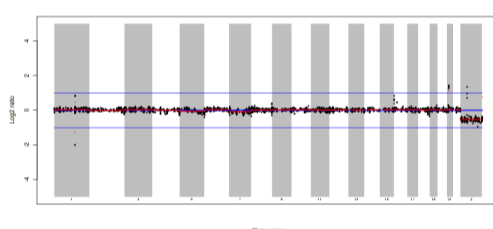

UID7393

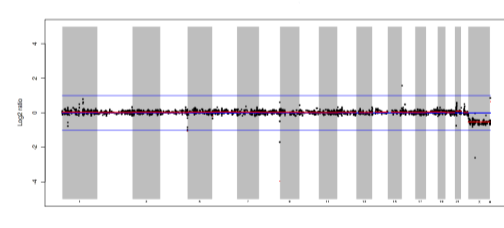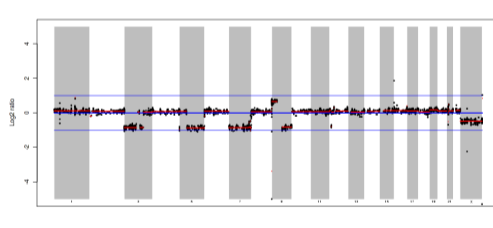

UID49278

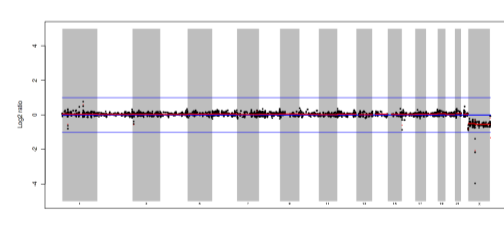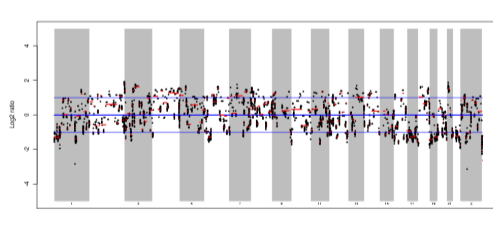

UID12484

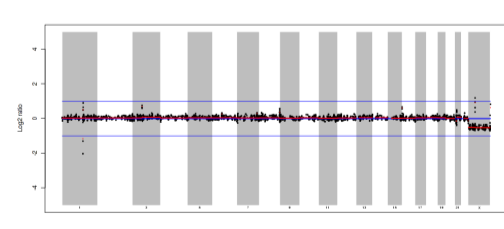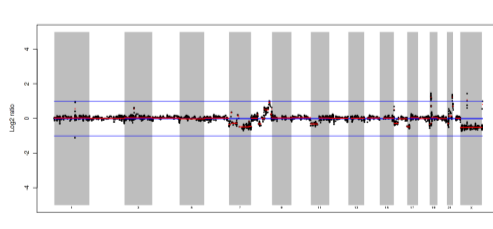

UID19304

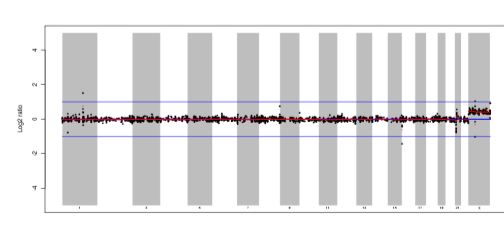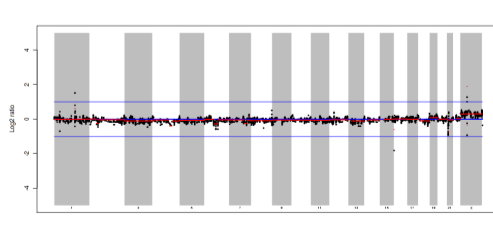

UID31000

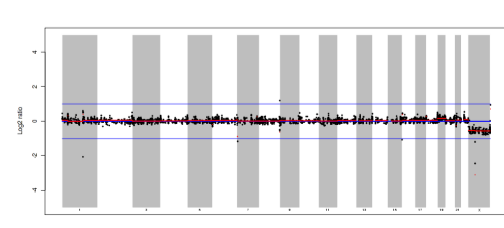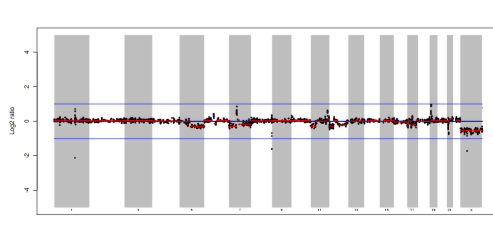

Supplement: ba007922-suppl1.pdf [file ba007922-suppl1.pdf]
